# Supplementary material
Source: publisher figshare collection journal article supplement (https://tandf.figshare.com/ndownloader/files/15072587)
Supplement: Supplementary file 1 [file 15072587]

# **Development of a large-scale computer-controlled ozone inhalation exposure system for rodents**

Gregory J. Smith<sup>a,\*</sup>, Leon Walsh<sup>b</sup>, Mark Higuchi<sup>b</sup>, and Samir N. P. Kelada<sup>a</sup>

*<sup>a</sup>Department of Genetics, Curriculum in Toxicology & Environmental Medicine, University of North Carolina at Chapel Hill, Chapel Hill, NC, USA; <sup>b</sup>United States Environmental Protection Agency, Research Triangle Park, NC, USA*

Ozone Chamber

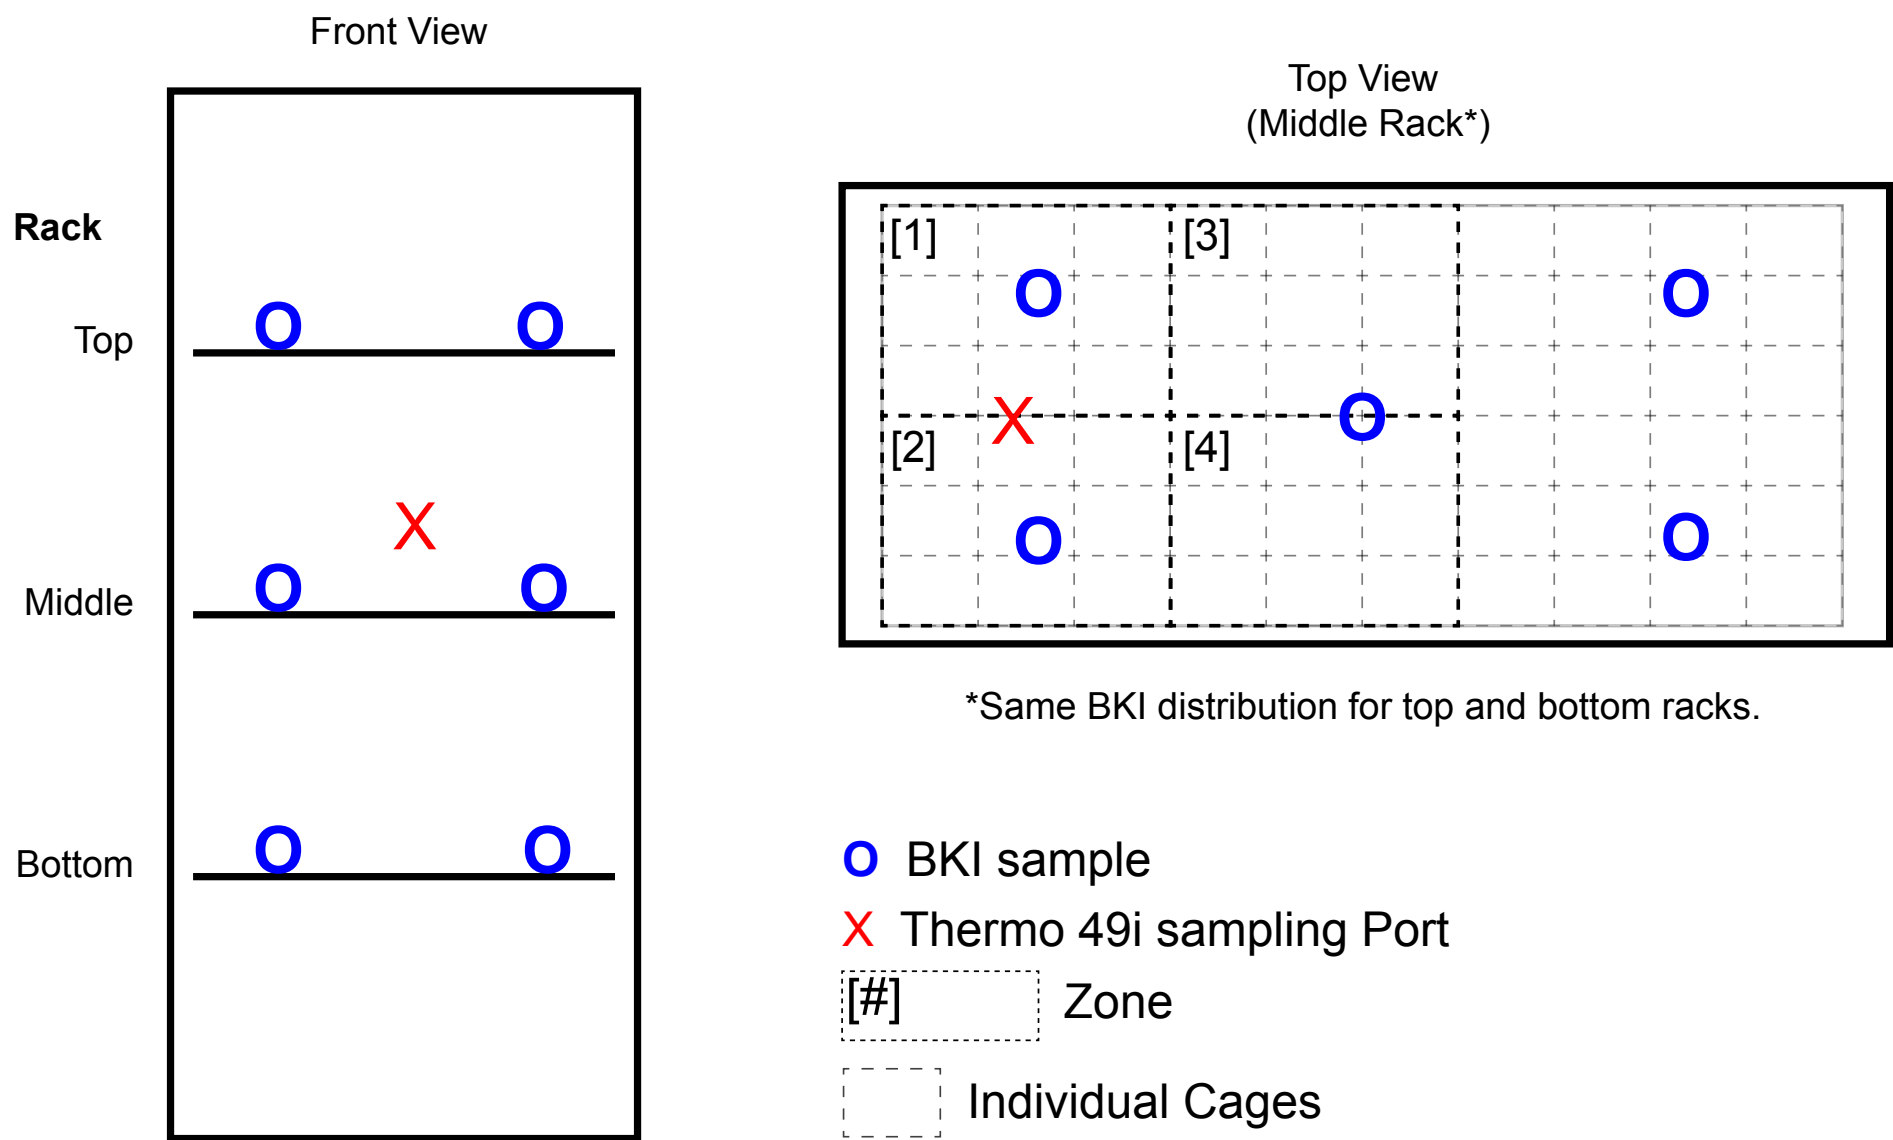

**Supplemental Figure 1.** Location of Thermo49i sampling port, BKI assay dishes, and zones for modeling the effect of subject placement on biological response.

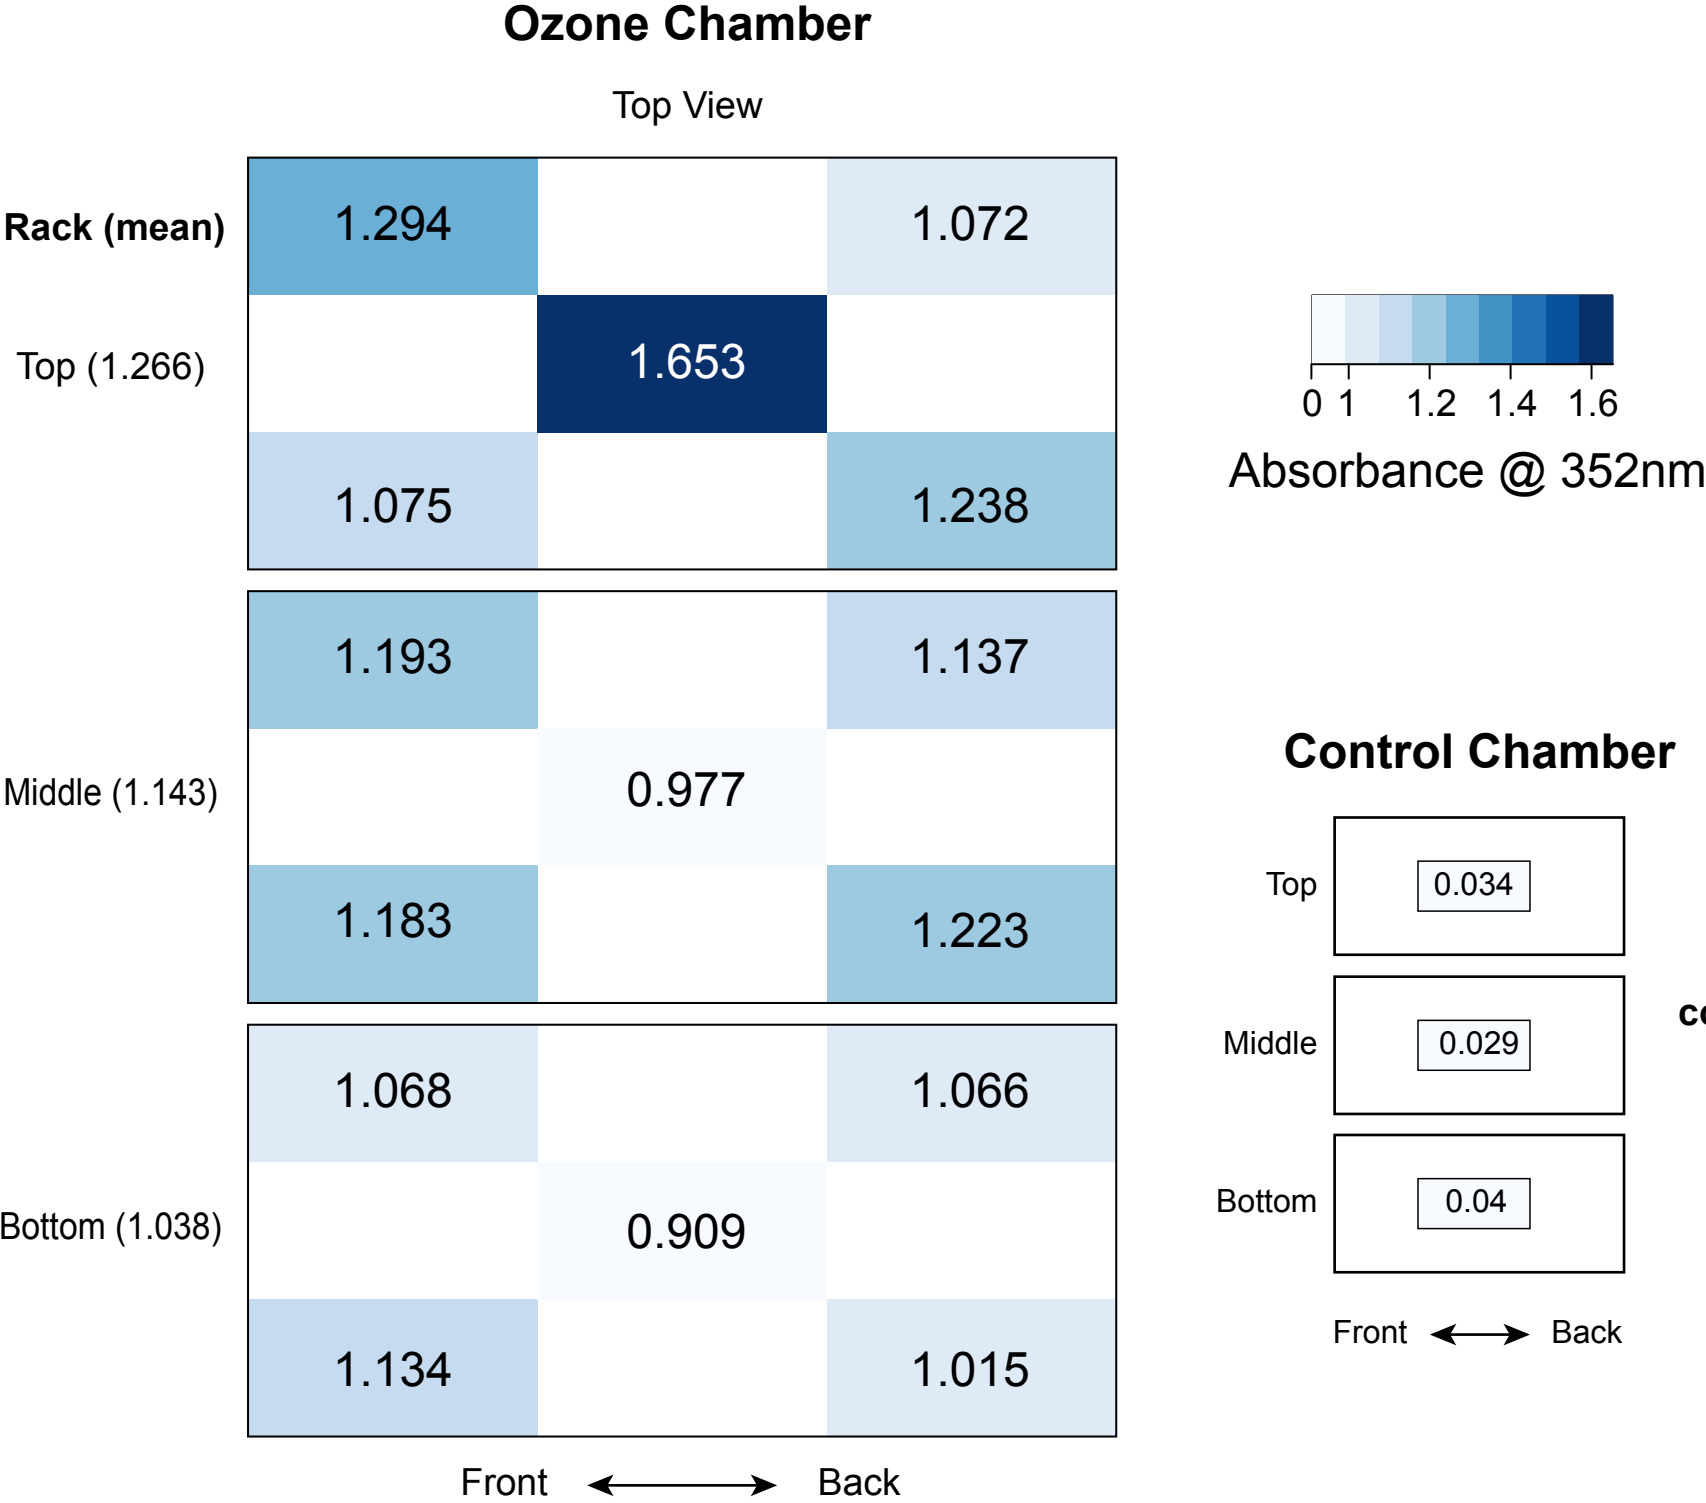

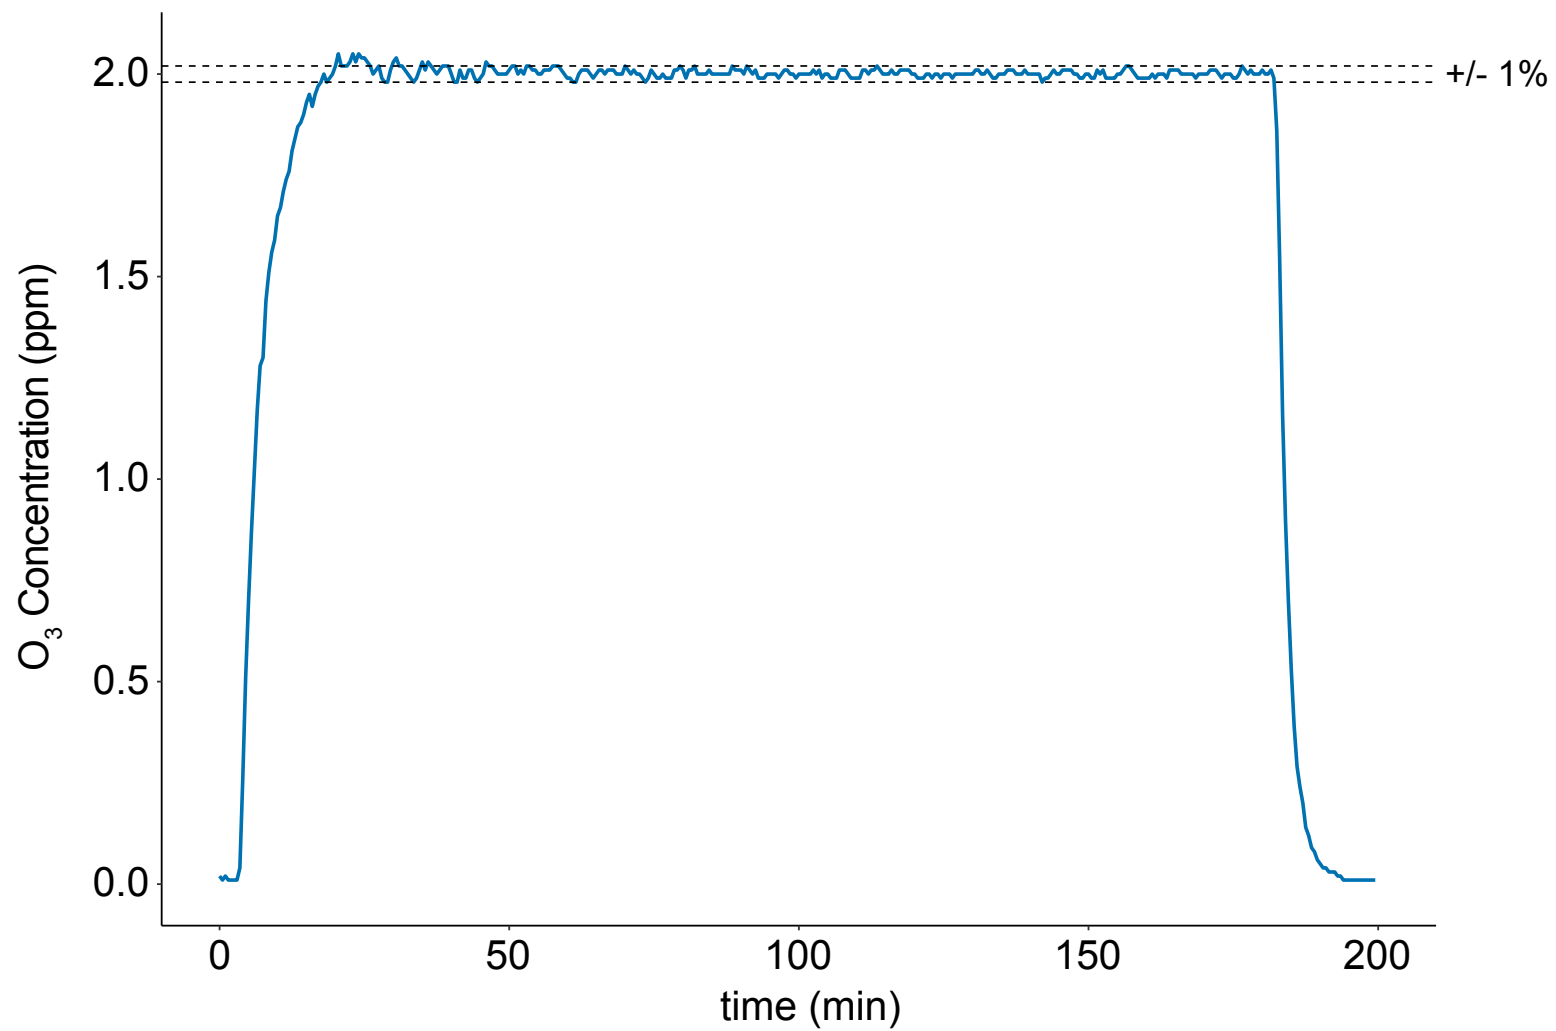

**Supplemental Figure 3.** Concentration profile of an exposure conducted with 50 mice present in the chamber. Plot represents a 30-second running average concentration over time.

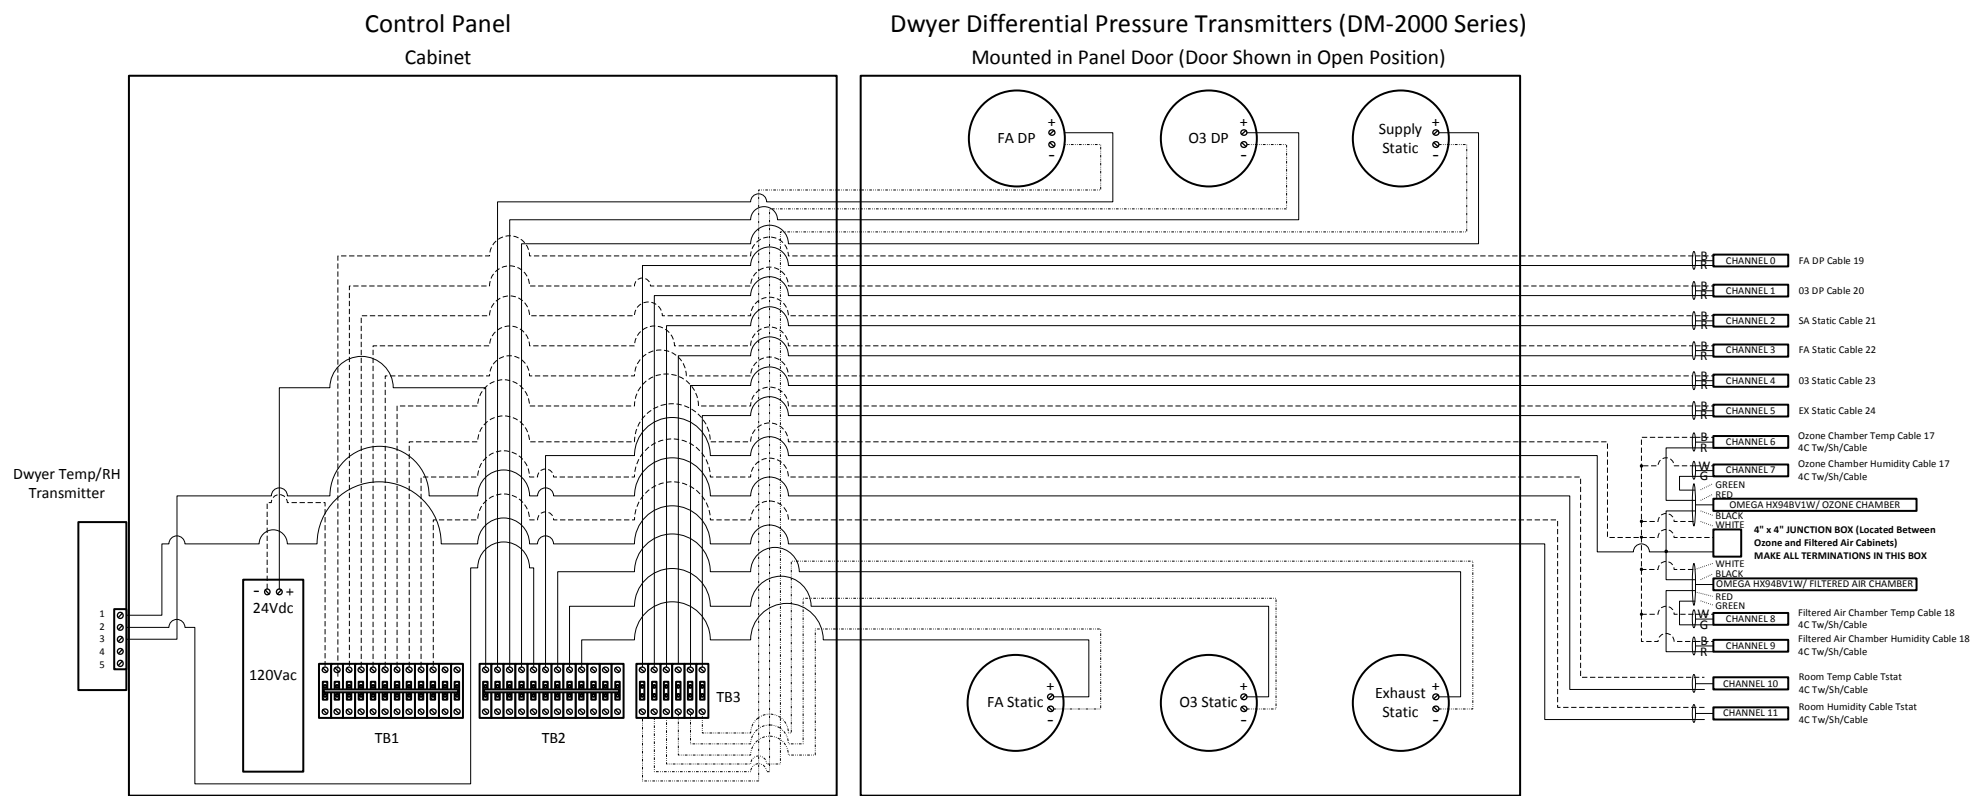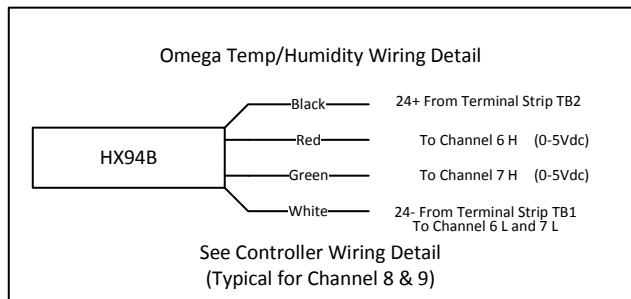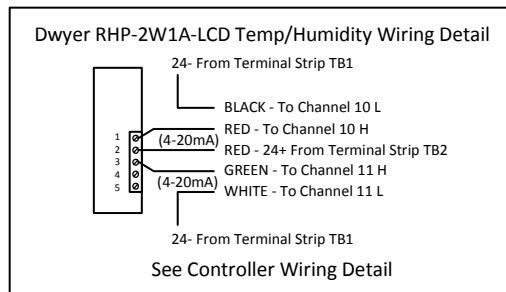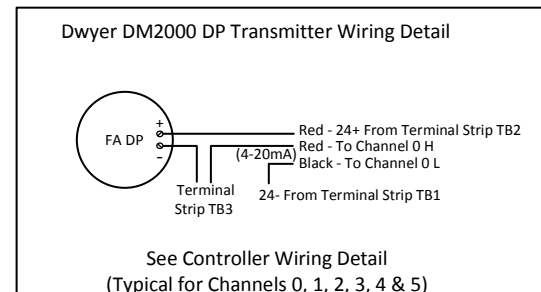

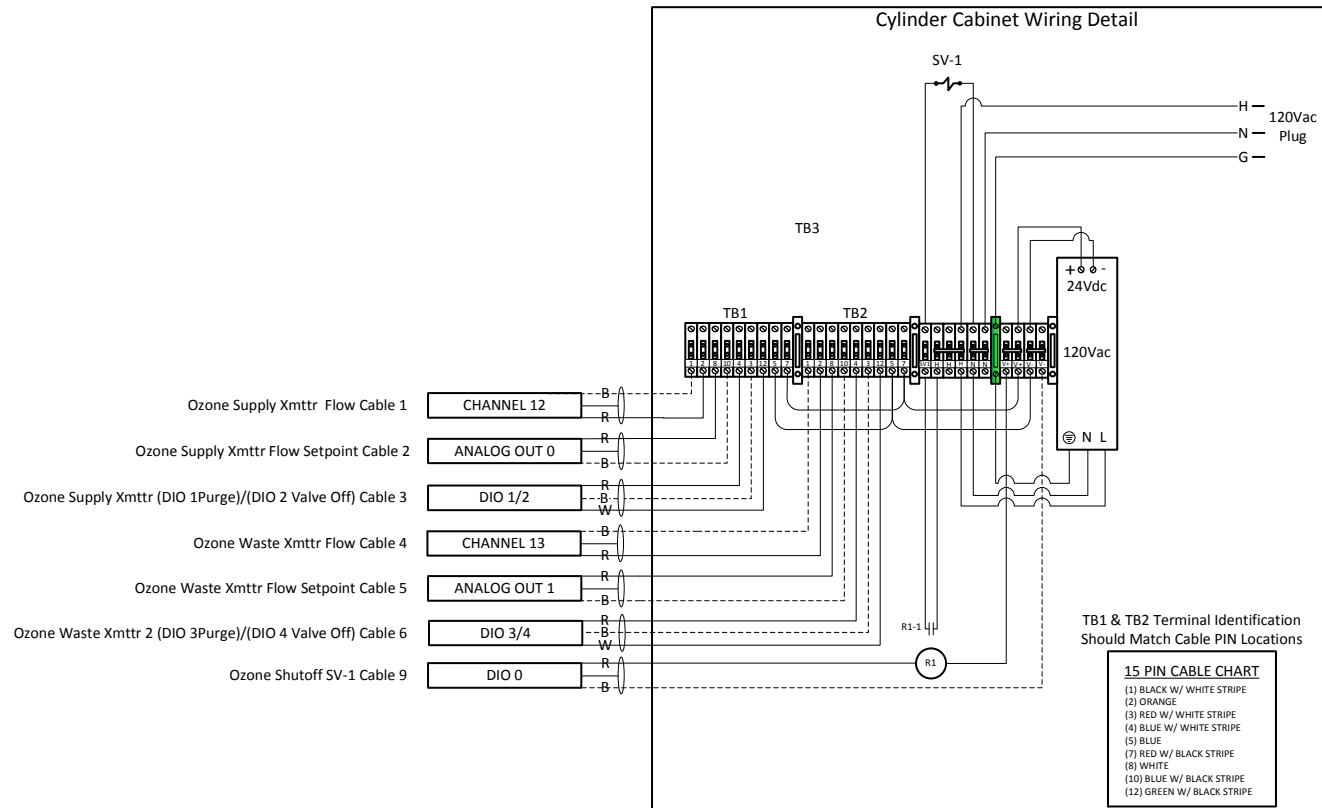

| PIN #  | Function                                    |
|--------|---------------------------------------------|
| 1      | 0-5Vdc Flow Signal Common                   |
| 2      | 0-5Vdc Flow Signal Output                   |
| 3      | Common                                      |
| 4      | Purge                                       |
| 5      | Power Supply Common                         |
| 7      | Power Supply +24Vdc                         |
| 8      | Remote Setpoint Input                       |
| 10     | Remote Setpoint Common                      |
| 12     | Valve Off Control                           |
| 1 & 2  | 0-5Vdc Flow Signal Output                   |
| 3 & 4  | Purge                                       |
| 3 & 12 | Valve Off Control                           |
| 5 & 7  | 24 Vdc Power Supply to Mass Flow Controller |
| 8 & 10 | 0-5Vdc Remote Setpoint                      |

## Gas Cylinder Cabinet Wiring

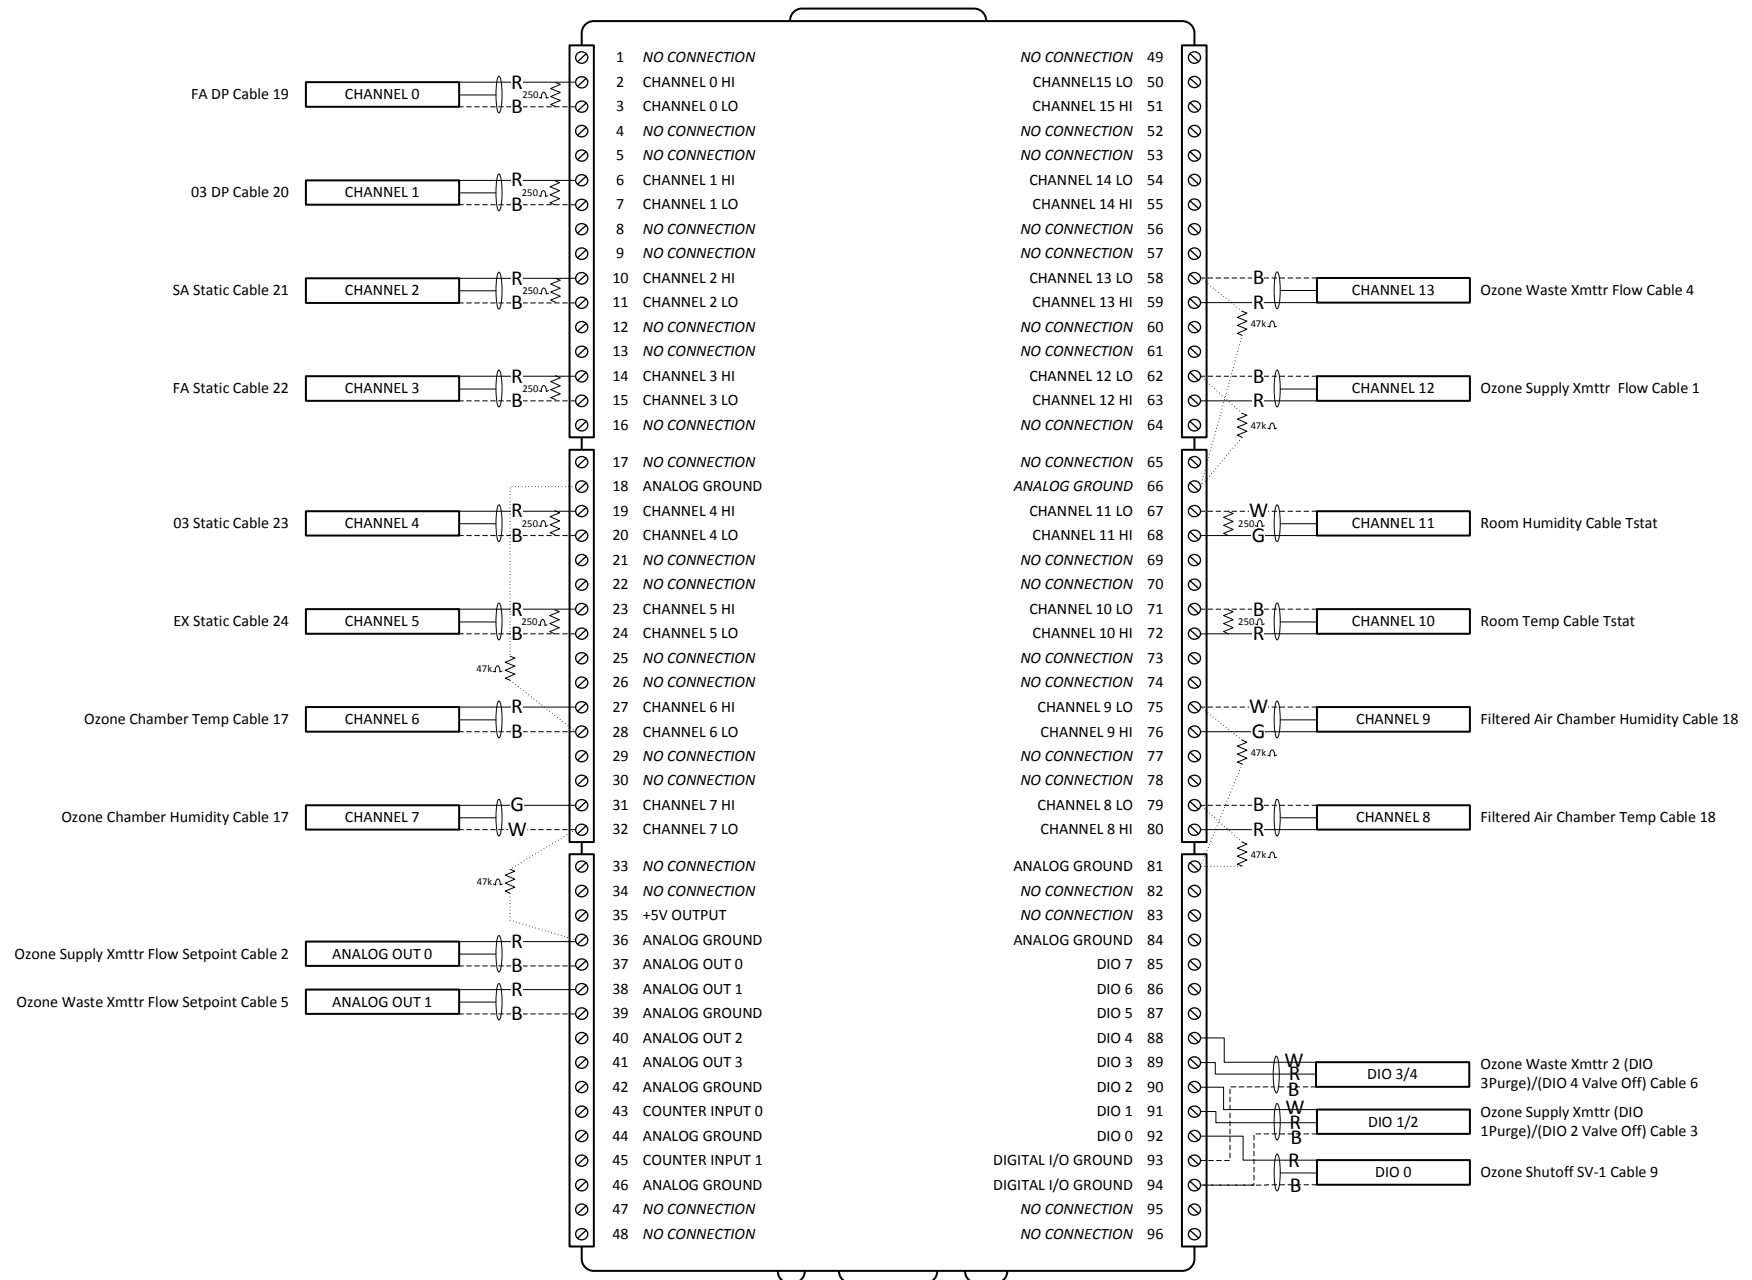

USB-2416-4AO Multi Functional DAQ Device Wiring

| Point Address | Point Type     | Point Description                 | Cable # | Wire Color | Further Description                                                  |
|---------------|----------------|-----------------------------------|---------|------------|----------------------------------------------------------------------|
| DO0           | Digital Output | Solenoid Valve SV-1               | 9       | Red        | Relay 5 in Cylinder Cabinet/120V Omega Solenoid                      |
| Ground        |                |                                   |         | Black      | Connected to Relay 5 Common                                          |
| DO1           | Digital Output | Mass Flow Xmttr 1 Purge           | 3       | Red        | Relay 1 in Cylinder Cabinet/Connected to PIN 4 AALBORG 15 PIN Cable  |
| Ground        |                |                                   |         | Black      | Relay 1 & 2 in Cylinder Cabinet                                      |
| DO2           | Digital Output | Mass Flow Xmttr 1 Valve Off       | 6       | White      | Relay 2 in Cylinder Cabinet/Connected to PIN 12 AALBORG 15 PIN Cable |
| DO3           | Digital Output | Mass Flow Xmttr 2 Purge           |         | Red        | Relay 3 in Cylinder Cabinet/Connected to PIN 4 AALBORG 15 PIN Cable  |
| Ground        |                |                                   |         | Black      | Relay 3 & 4 in Cylinder Cabinet                                      |
| DO4           | Digital Output | Mass Flow Xmttr 2 Valve Off       |         | White      | Relay 4 in Cylinder Cabinet/Connected to PIN 12 AALBORG 15 PIN Cable |
| AO0           | 0-5Vdc         | Mass Flow Xmttr 1 Flow Setpoint   | 2       | Red        | Connected to PIN 8 AALBORG 15 PIN Cable                              |
| Ground        |                |                                   |         | Black      | Connected to PIN 10 AALBORG 15 PIN Cable                             |
| AO1           | 0-5Vdc         | Mass Flow Xmttr 2 Flow Setpoint   | 5       | Red        | Connected to PIN 8 AALBORG 15 PIN Cable                              |
| Ground        |                |                                   |         | Black      | Connected to PIN 10 AALBORG 15 PIN Cable                             |
| Channel 0 Hi  | 4-20mA*        | Filtered Air Chamber Differential | 19      | Red        | COM on Dwyer DP Xmttr                                                |
| Channel 0 Lo  |                |                                   |         | Black      | Power Supply Ground                                                  |
| Channel 1 Hi  | 4-20mA*        | Ozone Chamber Differential        | 20      | Red        | COM on Dwyer DP Xmttr                                                |
| Channel 1 Lo  |                |                                   |         | Black      | Power Supply Ground                                                  |
| Channel 2 Hi  | 4-20mA*        | Supply Air Static                 | 21      | Red        | COM on Dwyer DP Xmttr                                                |
| Channel 2 Lo  |                |                                   |         | Black      | Power Supply Ground                                                  |
| Channel 3 Hi  | 4-20mA*        | Filtered Air Chamber Static       | 22      | Red        | COM on Dwyer DP Xmttr                                                |
| Channel 3 Lo  |                |                                   |         | Black      | Power Supply Ground                                                  |
| Channel 4 Hi  | 4-20mA*        | Ozone Cabinet Static              | 23      | Red        | COM on Dwyer DP Xmttr                                                |
| Channel 4 Lo  |                |                                   |         | Black      | Power Supply Ground                                                  |
| Channel 5 Hi  | 4-20mA*        | Exhaust Static                    | 24      | Red        | COM on Dwyer DP Xmttr                                                |
| Channel 5 Lo  |                |                                   |         | Black      | Power Supply Ground                                                  |
| Channel 6 Hi  | 0-5Vdc**       | Ozone Chamber Temperature         | 17      | Red        | Connected to Red Lead Wire on OMEGA HX94B                            |
| Channel 6 Lo  |                | Common                            |         | Black      | Connected to White Lead Wire on OMEGA HX94B                          |
| Channel 7 Hi  | 0-5Vdc**       | Ozone Chamber Humidity            |         | Green      | Connected to Green Lead Wire on OMEGA HX94B                          |
| Channel 7 Lo  |                | Common                            |         | White      | Connected to White Lead Wire on OMEGA HX94B                          |
| Channel 8 Hi  | 0-5Vdc**       | Filtered Air Chamber Temperature  | 18      | Red        | Connected to Red Lead Wire on OMEGA HX94B                            |
| Channel 8 Lo  |                | Common                            |         | Black      | Connected to White Lead Wire on OMEGA HX94B                          |
| Channel 9 Hi  | 0-5Vdc**       | Filtered Air Chamber Humidity     |         | Green      | Connected to Green Lead Wire on OMEGA HX94B                          |
| Channel 9 Lo  |                | Common                            |         | White      | Connected to White Lead Wire on OMEGA HX94B                          |
| Channel 10 Hi | 4-20mA*        | Room Temperature                  | T'Stat  | Red        | Connected to Terminal 1 on Dwyer RHP-2W1X-LCD Xmttr                  |
| Channel 10 Lo |                | Common                            |         | Black      | Connected to TB1 in Wall Cabinet                                     |
| Channel 11 Hi | 4-20mA*        | Room Humidity                     |         | Green      | Connected to Terminal 3 on Dwyer RHP-2W1X-LCD Xmttr                  |
| Channel 11 Lo |                | Common                            |         | White      | Connected to TB1 in Wall Cabinet                                     |
| Channel 12 Hi | 0-5Vdc**       | Mass Flow Xmttr 1 Flow            | 1       | Red        | Connected to PIN 2 AALBORG 15 PIN Cable                              |
| Channel 12 Lo |                | Common                            |         | Black      | Connected to PIN 1 AALBORG 15 PIN Cable                              |
| Channel 13 Hi | 0-5Vdc**       | Mass Flow Xmttr 2 Flow            | 4       | Red        | Connected to PIN 2 AALBORG 15 PIN Cable                              |
| Channel 13 Lo |                | Common                            |         | Black      | Connected to PIN 1 AALBORG 15 PIN Cable                              |
| Channel 14 Hi |                | Not Used                          |         |            |                                                                      |
| Channel 14 Lo |                | Not Used                          |         |            |                                                                      |
| Channel 15 Hi |                | Not Used                          |         |            |                                                                      |
| Channel 15 Lo |                | Not Used                          |         |            |                                                                      |

\* 4-20mA Inputs require a 250 Ohm resistor to be wired from Channelx Hi and Lo terminals of the USB-2416-4AO DAQ Device.

\*\* 0-5Vdc Inputs require a 47k Ohm resistor to be wired from Channelx Lo to Analog Ground on the USB-2416-4AO DAQ Device.

## USB-2416-4AO Multi Functional DAQ Device Wiring Detail
